# Supplementary material for: Pro- vs. Anti-Inflammatory Features of Monocyte Subsets in Glioma Patients
Source: MDPI journal article supplement (doi:10.3390/ijms24031879), 2023-01-18
Supplement: s1 [file s1]

Table S1: *P*-values for the data obtained by the multiple probability simulation in glioma patients' compared to a healthy volunteer group.

|                      | <i>p</i> -value     |                        |                         |
|----------------------|---------------------|------------------------|-------------------------|
|                      | Classical Monocytes | Intermediate Monocytes | Non-classical monocytes |
| <b>PD-1 [%]</b>      | -                   | <0.0001                | -                       |
| <b>PD-L1 [%]</b>     | <0.0001             | <0.0001                | <0.0001                 |
| <b>PD-L1 MFI</b>     | 0.8822              | <0.0001                | <0.0001                 |
| <b>SIRPalpha [%]</b> | <0.0001             | <0.0001                | 0.0842                  |
| <b>SIRPalpha MFI</b> | <0.0001             | 0.0001                 | <0.0001                 |
| <b>IL-12 [%]</b>     | 0.8706              | 0.0014                 | <0.0001                 |
| <b>TNF [%]</b>       | 0.0554              | 0.003                  | <0.0001                 |
| <b>IL-10 [%]</b>     | 0.4675              | <0.0001                | 0.6493                  |
| <b>TGF-beta [%]</b>  | 0.0008              | <0.0001                | 0.0005                  |

To confirm the significance of the obtained results, the Monte Carlo Method was used to simulate the data (n=100) based on the results (n=24) which showed statistical significance in comparison between the expression of immune checkpoint and cytokine molecules expression in glioma patients' compared to a healthy volunteer group. '-' symbolize the absence of statistical significance when comparing 24 original results to the control.

PD-1, programmed cell death 1 protein; PD-L1, programmed cell death 1 ligand, MFI, mean fluorescence intensity; SIRPalpha, signal-regulatory protein alpha; TNF, tumor necrosis factor; TGF-beta, transforming growth factor beta
